# Supplementary material for: Efficacy of Gene Therapy Is Dependent on Disease Progression in Dystrophic Mice with Mutations in the FKRP Gene
Source: PubMed Central journal article supplement (PMC5415313; doi:10.1016/j.omtm.2017.02.002), 2017-03-08
Supplement: mmc1.pdf [file mmc1.pdf]

**OMTM, Volume 5**

**Supplemental Information**

**Efficacy of Gene Therapy Is Dependent  
on Disease Progression in Dystrophic Mice  
with Mutations in the FKRP Gene**

**Charles Harvey Vannoy, Will Xiao, Peijuan Lu, Xiao Xiao, and Qi Long Lu**

## SUPPLEMENTARY INFORMATION

### Table of Contents

|                                                                     |   |
|---------------------------------------------------------------------|---|
| Figure S1. AAV9- <i>FKRP</i> vector construct .....                 | 2 |
| Table S1. Quantification of the fibrotic area in the diaphragm..... | 3 |
| Figure S2. Weight profiles.....                                     | 4 |
| Table S2. Echocardiographic measurements .....                      | 5 |

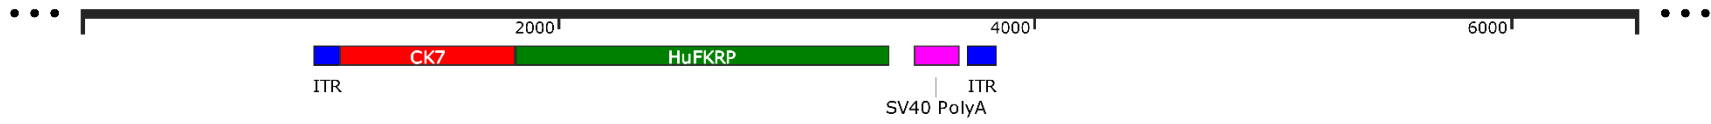

**Figure S1.** AAV9-*FKRP* vector construct. ITR, inverted terminal repeat of adenovirus; CK7, creatine kinase-based promoter; HuFKRP, full-length human *FKRP* coding sequence; SV40, Simian virus 40. Created with SnapGene®.

| Age of Mice<br>(Treatment Age) | 52 Weeks<br>(39 Weeks) | 39 Weeks<br>(n/a) | 39 Weeks<br>(26 Weeks) | 26 Weeks<br>(n/a) | 26 Weeks<br>(13 Weeks) | 13 Weeks<br>(n/a) | 18 Weeks<br>(5 Weeks) | 5 Weeks<br>(n/a) |
|--------------------------------|------------------------|-------------------|------------------------|-------------------|------------------------|-------------------|-----------------------|------------------|
| AAV9- <i>FKRP</i>              | +                      | -                 | +                      | -                 | +                      | -                 | +                     | -                |
| Fibrotic Area (%)              | 45.7±0.7               | 44.2±1.7          | 35.5±1.0               | 32.0±0.7          | 20.5±1.3               | 19.9±0.9          | 9.5±0.9               | 11.1±1.5         |

**Table S1.** Quantification of the fibrotic area in the diaphragm of *FKRP*<sup>P448L</sup> mutant mice injected with AAV9-*FKRP* (+) or untreated (-) for each cohort (n = 4).

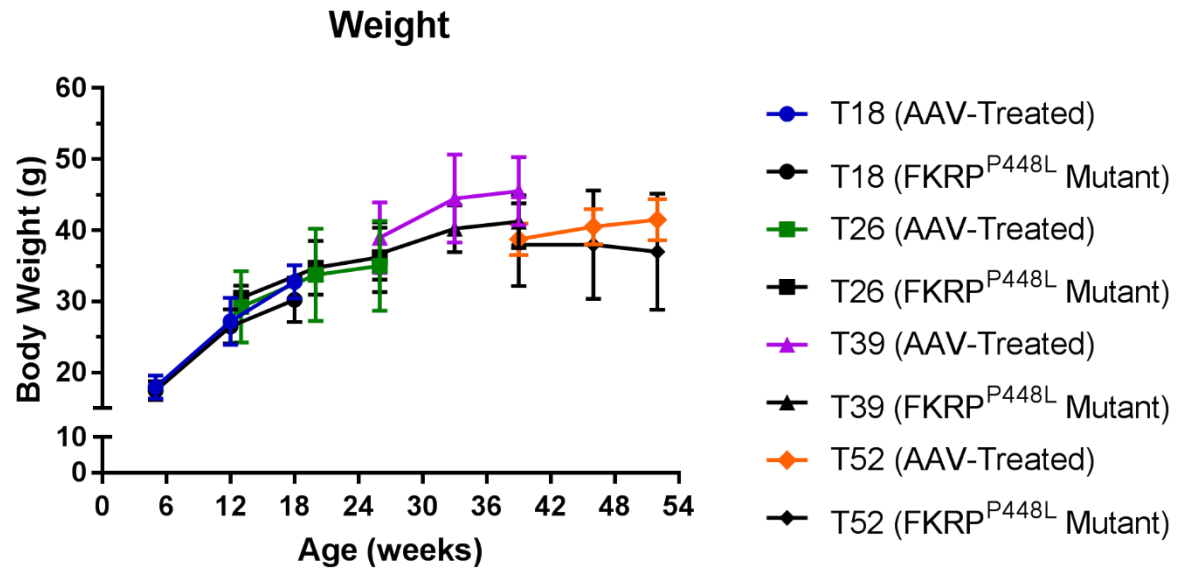

**Figure S2.** Weight profiles of the AAV-treated and FKRP<sup>P448L</sup> mutant mice in each cohort.

| Cardiac Parameters | Post-Injection Time Point | T18         |                              | T26         |                              | T39         |                              | T52         |                              |
|--------------------|---------------------------|-------------|------------------------------|-------------|------------------------------|-------------|------------------------------|-------------|------------------------------|
|                    |                           | AAV Treated | FKRP <sup>P448L</sup> Mutant | AAV Treated | FKRP <sup>P448L</sup> Mutant | AAV Treated | FKRP <sup>P448L</sup> Mutant | AAV Treated | FKRP <sup>P448L</sup> Mutant |
| HR (beats/min)     | 0 Week                    | 508±20      | 528±8                        | 513±4       | 519±12                       | 497±15      | 526±6                        | 536±6       | 522±11                       |
|                    | 12 Week                   | 510±13      | 495±5                        | 452±21      | 509±15                       | 537±15      | 510±12                       | 520±13      | 491±21                       |
|                    | % Change                  | 0.4%        | -6.3%                        | -11.8%      | -1.8%                        | 7.9%        | -3.0%                        | -3.0%       | -5.9%                        |
| LVEF (%)           | 0 Week                    | 64.5±2.8    | 65.3±3.3                     | 64.1±1.0    | 58.6±3.1                     | 60.7±3.1    | 61.7±3.9                     | 59.5±1.9    | 62.4±4.1                     |
|                    | 12 Week                   | 58.0±2.9    | 56.2±2.5                     | 52.1±3.5    | 57.1±1.8                     | 57.1±2.1    | 61.8±2.9                     | 50.7±1.6    | 55.8±2.8                     |
|                    | % Change                  | -10.1%      | -13.9%                       | -18.8%      | -2.5%                        | -5.9%       | 0.1%                         | -14.8%      | -10.6%                       |
| SV (mL)            | 0 Week                    | 0.016±0.002 | 0.016±0.001                  | 0.024±0.004 | 0.017±0.002                  | 0.019±0.000 | 0.020±0.002                  | 0.018±0.003 | 0.023±0.003                  |
|                    | 12 Week                   | 0.017±0.001 | 0.019±0.002                  | 0.013±0.001 | 0.021±0.001                  | 0.023±0.002 | 0.018±0.001                  | 0.021±0.002 | 0.023±0.003                  |
|                    | % Change                  | 8.8%        | 16.2%                        | -43.9%      | 23.2%                        | 21.6%       | -9.2%                        | 16.5%       | -0.6%                        |
| CO (mL/min)        | 0 Week                    | 8.07±1.18   | 8.50±0.68                    | 12.06±2.11  | 8.94±1.09                    | 9.56±0.28   | 10.34±1.01                   | 9.42±1.36   | 11.77±1.40                   |
|                    | 12 Week                   | 8.74±0.56   | 9.23±1.22                    | 5.88±0.23   | 10.68±0.44                   | 12.55±1.22  | 9.08±0.47                    | 10.56±0.81  | 11.18±1.74                   |
|                    | % Change                  | 8.3%        | 8.6%                         | -51.3%      | 19.5%                        | 31.3%       | -12.2%                       | 12.0%       | -5.0%                        |

**Table S2.** Echocardiographic measurements. HR, heart rate; LVEF, left ventricle ejection fraction; SV, stroke volume; CO, cardiac output.
